# Supplementary material for: Protein Profiling Reveals Novel Proteins in Pollen and Pistil of W22 (ga1; Ga1) in Maize
Source: MDPI journal article supplement (doi:10.3390/proteomes2020258), 2014-05-05

## Supplementary Material for

# Protein Profiling Reveals Novel Proteins in Pollen and Pistil of W22 (*ga1*; *Ga1*) in Maize

**Supplementary Figure S1.** The triplicate SDS-PAGE pattern in the pollen and pistil of W22 (*ga1*; *Ga1*) in maize. The gels were stained using CBB staining. Standard molecular weight (kDa) is on the left.

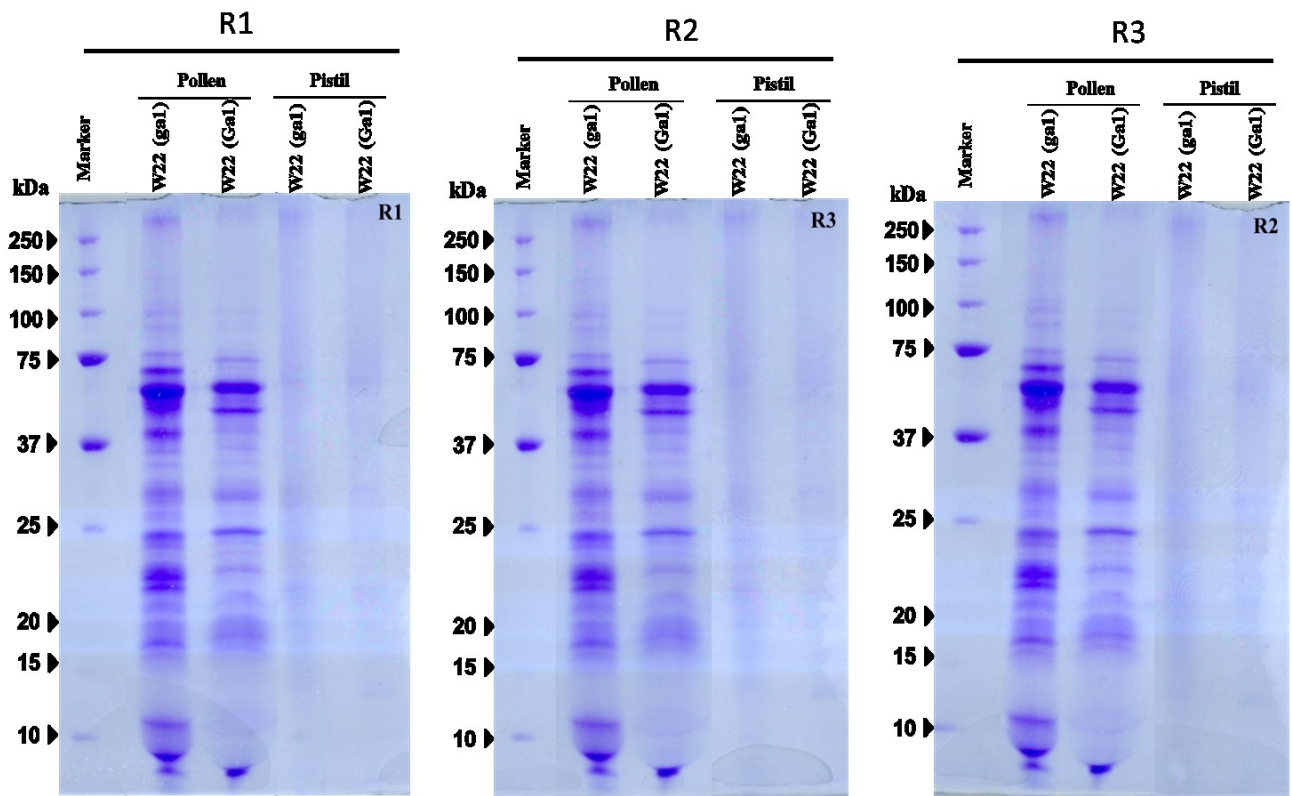

Supplement: s1 [file s1]
